# The World Mortality Dataset: Tracking excess mortality across countries during the COVID-19 pandemic

Ariel Karlinsky<sup>1,✉</sup> and Dmitry Kobak<sup>2,✉</sup>

<sup>1</sup>*Hebrew University, Jerusalem, Israel*

<sup>2</sup>*Institute for Ophthalmic Research, University of Tübingen, Germany*

[ariel.karlinsky@mail.huji.ac.il](mailto:ariel.karlinsky@mail.huji.ac.il), [dmitry.kobak@uni-tuebingen.de](mailto:dmitry.kobak@uni-tuebingen.de)

April 11, 2021

## Abstract

Comparing the impact of the COVID-19 pandemic between countries or across time is difficult because the reported numbers of cases and deaths can be strongly affected by testing capacity and reporting policy. Excess mortality, defined as the increase in all-cause mortality relative to the expected mortality, is widely considered as a more objective indicator of the COVID-19 death toll. However, there has been no central, frequently-updated repository of the all-cause mortality data across countries. To fill this gap, we have collected weekly, monthly, or quarterly all-cause mortality data from 89 countries and territories, openly available as the regularly-updated World Mortality Dataset. We used this dataset to compute the excess mortality in each country during the COVID-19 pandemic. We found that in the worst-affected countries the annual mortality increased by over 50%, while in several other countries it decreased by over 5%, presumably due to lockdown measures decreasing the non-COVID mortality. Moreover, we found that while some countries have been reporting the COVID-19 deaths very accurately, many countries have been underreporting their COVID-19 deaths by an order of magnitude or more. Averaging across the entire dataset suggests that the world’s COVID-19 death toll may be at least 1.6 times higher than the reported number of deaths.

## 1 Introduction

The impact of COVID-19 on a given country is usually assessed via the number of cases and the number of deaths, two statistics that have been reported daily by each country and put together into international dashboards such as the one maintained by the Johns Hopkins University (Dong et al., 2020). However, both metrics can be heavily affected by limited testing availability and by different definitions of ‘COVID-19 death’ used by different countries: some countries count only confirmed COVID-19 deaths, while others include suspected COVID-19 deaths or deaths from other causes in confirmed COVID-19 cases.

Excess mortality, defined as the increase of the all-cause mortality over the mortality expected based on historic trends, has long been used to estimate the true toll of pandemics and other extreme events — from the Great Plague of London in 1665 (as described in Boka and Wainer, 2020), to the influenza epidemic in London in 1875 (Farr, 1885; Langmuir, 1976), and more recently e.g. Hurricane Maria in Puerto-Rico in 2016 (Milken Institute, 2018). The consensus, therefore, is that the most objective indicator of the COVID-19 death toll, even referred to as the ‘gold standard’, is the excess mortality (Beaney et al., 2020; Leon et al., 2020). Excess mortality has already been used to estimate the COVID-19 impact in different countries, both in academic literature (e.g. Kontis et al., 2020; Alicandro et al., 2020; Ghafari et al., 2020; Woolf et al., 2020a,b; Weinberger et al., 2020; Blangiardo et al., 2020; Kobak, 2021) and by major media outlets. It has also been used to compare COVID-19 impact to the impact of major influenza pandemics (Faust et al., 2020; Petersen et al., 2020).

Measuring excess mortality across different countries requires, first and foremost, a comprehensive and regularly-updated dataset on all-cause mortality. However, there has been no single resource where such data would be collected from all over the world. The *World Mortality Dataset* presented here aims to fill this gap by combining publicly-available information on country-level mortality, culled and harmonized from various sources.

Several teams have already started to collect such data. In April 2020, EuroStat (<http://ec.europa.eu/eurostat>) began collecting total weekly deaths across European countries, “in order to support the policy and research efforts in the EU on COVID-19.” A note on the EuroStat website states that the data is not certified by peer review and should not be used to guide clinical practice and also contains sub-national (NUTS2 and NUTS3 regions) data as well as data disaggregated by age groups and

by sex for some countries. In May 2020, the Human Mortality Database (<http://mortality.org>), a joint effort by the University of California, Berkeley, and Max Planck Institute for Demographic Research (Barbieri et al., 2015), started cooperating with National Statistics Offices (NSOs) and other national institutions in compiling the *Short Term Mortality Fluctuations* (STMF) dataset (STMF, 2021; Németh et al., 2021). This dataset consists of weekly data, disaggregated by five age groups and by sex, and currently contains 35 countries with 2020 data. Both datasets are regularly updated and have considerable overlap, covering together only 44 countries.

In parallel, the EuroMOMO project (<https://www.euromomo.eu>), existing since 2008, has been displaying weekly excess mortality in 22 European countries, but without giving access to the underlying data. Another source of data is the UNDATA initiative (<http://data.un.org>; search for ‘Deaths by month of death’) by the United Nations, collecting monthly mortality data across a large number of countries. However, information there is updated very slowly, with January–June 2020 data currently available for only four countries.

Media outlets such as the *Financial Times*, *The Economist*, the *New York Times*, and the *Wall Street Journal* have been compiling and openly sharing their own datasets in order to report on the all-cause mortality in 2020. However, these datasets are infrequently updated and their future is unclear. For example, the *New York Times* announced in early 2021 that they would stop tracking excess deaths due to staffing changes.

Here, we present the *World Mortality Dataset* that aims to provide regularly-updated all-cause mortality numbers from all over the world. The dataset is openly available at [https://github.com/akarlinsky/world\\_mortality](https://github.com/akarlinsky/world_mortality) and is updated almost daily. Our dataset builds upon the EuroStat and the STMF datasets, adding 45 additional countries — many more than any previous media or academic effort. At the time of writing, our dataset comprises 89 countries and territories. After the initial release of our manuscript, the dataset has been incorporated into the excess mortality trackers by *Our World in Data* (Giattino et al., 2020), *The Economist* and the *Financial Times*. While not all countries provide equally detailed and reliable data, we believe that information from all 89 countries is reliable enough to allow computation of excess mortality (see Discussion).

Our analysis (updated almost daily at <https://github.com/dkobak/excess-mortality>) shows statistically significant positive excess mortality in 66 out of 89 countries. Moreover, it suggests that the true COVID-19 death toll in several countries is over an order of magnitude larger than the official COVID-19 death count.

## 2 Methods

### 2.1 World Mortality Dataset

For all countries that are not covered by EuroStat or STMF, we aimed to collect the all-cause mortality data from their National Statistics Offices (NSOs), Population Registries, Ministries of Health, Ministries of Public Health, etc., collectively referred to here as ‘NSOs’.

Our strategy was to search for mortality numbers for every country on their NSO’s website. The data may be present in the form of a spreadsheet, a table generator, a periodical bulletin, a press release, a figure that required digitizing, etc. If we were unable to locate such data, we contacted the NSO via email, a contact form on their website, or on social media, asking them if they have weekly, monthly, or quarterly data on all-cause mortality for 2020.

Responses from NSOs have varied substantially. Some have provided us with the requested information, some replied that no such data were available, some did not respond at all. For many countries, the email addresses did not work and returned an error message. Here are some representative examples of the declining responses: “Due to the federal organization of our country, we don’t have 2020 mortality data available yet” (Argentina); “We are sorry to inform you that we do not have the data you requested” (China); “These are not available” (India); “Unfortunately we don’t have this data. Currently, we only have the number of people dying from traffic accidents (by month)” (Vietnam); “Unfortunately, we do not have a mechanism in place at the moment to capture routine mortality data in-country nation-wide [...] As you may also be aware, death or mortality registration or reporting is yet a huge challenge in developing countries [...]” (Liberia).

We included the data into our dataset from 2015 onwards if it satisfied the following inclusion criteria: (1) data were in weekly, monthly or quarterly format (we preferred weekly data whenever available); (2) data existed at least until June 2020; (3) there were data for at least one entire year before 2020 (or a forecast for 2020, see below). At the time of writing, our dataset comprises 89 countries and territories (Figure 1).

For the weekly data, we preferred ISO weeks whenever possible (for Peru, Sweden, Ecuador, and Guatemala we converted daily data into ISO weeks). For Liechtenstein and Taiwan we preferred monthly format over weekly data from STMF/EuroStat, because weekly data were very noisy or less up-to-date. The data for Iran are available in quarterly format, where quarters start on December 21, March 21, June 21, and September 21 (Solar Hijri seasons). We treated the season starting on December 21 as the first data point for the following year.



known month but unknown week uniformly across weeks, and similarly redistributed the remaining deaths with known year but unknown month.

Fifth, for three countries (Bolivia, El Salvador, Nicaragua) some of the values were taken from media reports which in turn obtained them from the respective NSOs. The exact source for each data point is given at [https://github.com/akarlinsky/world\\_mortality](https://github.com/akarlinsky/world_mortality).

Despite all the caveats and limitations listed above, all our data are self-consistent: the baseline mortality that we predict for 2020 agrees very well with the pre-COVID 2020 mortality in all cases. Note that our projection for 2020 uses a linear trend (see Section 2.3) and so can implicitly account for improvements in death registration. We therefore believe that for countries with possibly incomplete coverage our excess mortality estimates provide a lower bound.

### 2.3 Excess mortality

In order to estimate the excess mortality, we first estimated the expected, or baseline, mortality for 2020 using the historical data from 2015–2019 (or as many years from this interval as were available; see above). We fitted the following regression model separately for each country:

$$D_{t,Y} = \alpha_t + \beta \cdot Y + \epsilon. \quad (1)$$

Here  $D_{t,Y}$  is the number of deaths observed on week (or month, or quarter)  $t$  in year  $Y$ ,  $\beta$  is a linear slope across years,  $\alpha_t$  are separate intercepts (fixed effects) for each week (month/quarter), and  $\epsilon \sim \mathcal{N}(0, \sigma^2)$  is Gaussian noise. This model can capture both seasonal variation in mortality and a yearly trend over recent years due to changing population structure or socio-economic factors.

As an example, using monthly death data from Russia ( $R^2 = 0.72$ ,  $F = 10.2$ ), we obtained  $\hat{\beta} = -2346$  ( $t = 4.4$ ), meaning that each year the number of monthly deaths decreases on average by over 2300. In contrast, using weekly data from the United States ( $R^2 = 0.89$ ,  $F = 33.4$ ), we obtained  $\hat{\beta} = 834$  ( $t = 14.9$ ), meaning that each year the number of weekly deaths increases on average by over 800. In these two cases, as well as many other ones, the yearly trend was highly statistically significant, and using the average 2015–19 data as baseline would not be appropriate.

We took the model prediction for 2020 as the baseline for excess mortality calculations:

$$\hat{B}_t = \hat{\alpha}_t + \hat{\beta} \cdot 2020. \quad (2)$$

For the countries with weekly data, the model was fit using weeks 1–52, as the week 53 only happens in rare years (including 2020). The baseline for week 53 was then taken as equal to the value obtained for week 52. We took the same baseline for 2021 as for 2020, to avoid further extrapolation.

The excess mortality in each week (or month, or quarter) was defined as the difference between the actually observed death number and the baseline prediction. Note that the excess mortality can be negative, whenever the observed number of deaths is below the baseline. We summed the excess mortality estimates across all weeks starting from the week  $t_1$  when the country reported its first COVID-19 death (for monthly data, we started summation from March 2020; for quarterly data, from the beginning of 2020). This yields the final estimate of the excess mortality:

$$\Delta = \sum_{t \geq t_1} (D_{t,2020} - \hat{B}_t) + \sum_t (D_{t,2021} - \hat{B}_t). \quad (3)$$

We computed the variance  $\text{Var}[\Delta]$  of our estimator  $\Delta$  as follows. Let  $\mathbf{X}$  be the predictor matrix in the regression,  $\mathbf{y}$  be the response matrix,  $\hat{\boldsymbol{\beta}} = (\mathbf{X}^\top \mathbf{X})^{-1} \mathbf{X}^\top \mathbf{y}$  be the vector of estimated regression coefficients, and  $\hat{\sigma}^2 = \|\mathbf{y} - \mathbf{X}\hat{\boldsymbol{\beta}}\|^2 / (n - p)$  be the unbiased estimate of the noise variance, where  $n$  is the sample size and  $p$  is the number of predictors. Then  $\text{Cov}[\hat{\boldsymbol{\beta}}] = \hat{\sigma}^2 (\mathbf{X}^\top \mathbf{X})^{-1}$  is the covariance matrix of  $\hat{\boldsymbol{\beta}}$  and  $\mathbf{S} = \text{Cov}[\hat{B}_t] = \text{Cov}[\mathbf{X}_{2020} \hat{\boldsymbol{\beta}}] = \hat{\sigma}^2 \mathbf{X}_{2020} (\mathbf{X}^\top \mathbf{X})^{-1} \mathbf{X}_{2020}^\top$  is the covariance matrix of the predicted baseline values  $\hat{B}_t$  where  $\mathbf{X}_{2020}$  is the predictor matrix for the entire 2020. We introduce vector  $\mathbf{w}$  with elements  $w_t$  of length equal to the number of rows in  $\mathbf{X}_{2020}$ , set all elements before  $t_1$  to zero, all elements starting from  $t_1$  to 1, and increase by 1 all elements corresponding to the existing 2021 data. Then the variance of  $\Delta$  is given by

$$\text{Var}[\Delta] = \text{Var} \left[ \sum_t w_t \hat{B}_t \right] + \sum_t w_t \hat{\sigma}^2 = \mathbf{w}^\top \mathbf{S} \mathbf{w} + \hat{\sigma}^2 \|\mathbf{w}\|_1, \quad (4)$$

where the first term corresponds to the uncertainty of  $\hat{B}_t$  and the second term corresponds to the additive Gaussian noise. We took the square root of  $\text{Var}[\Delta]$  as the standard error of  $\Delta$ . Whenever the fraction  $|\Delta| / \sqrt{\text{Var}[\Delta]}$  was below 1.96, we considered the excess mortality for that country to be not significantly different from zero. Note

that for countries without raw historical data available (South Africa and Uruguay) we could not estimate the uncertainty. Note also that historic data for Ireland lacked week 1, so there we used weeks 2–52 for model fitting and then set the baseline for week 1 the same as for week 2 (for uncertainty calculation,  $w_0$  values were moved to  $w_1$ ).

There exist more elaborate statistical approaches for estimating the baseline (and thus the excess) mortality, for example modeling the seasonal variation using periodic splines, or controlling for the time-varying population size and age structure, or using a Poisson model (Farrington et al., 1996; Noufaily et al., 2013), etc. We believe that the large excess mortality seen around the world during the COVID-19 pandemic is robust to the exact model specification. Indeed, using an R package implementing the Improved Farrington model (Salmon et al., 2016) led to weekly excess mortality estimates with a correlation of 0.99 to our estimates, across all countries with weekly data available from 2015. We believe that our method achieves the compromise between flexibility and simplicity: it is the simplest approach that captures both the seasonal variation and the yearly trend, and is far more transparent than more elaborate methods. Note that our uncertainty estimation assumes iid noise in Eq. 1. In reality, the noise may be temporally or spatially autocorrelated, which would affect the variance of  $\hat{B}_t$ .

We subtracted 4,000 from the excess mortality estimates for Armenia and Azerbaijan to account for the 2020 Nagorno-Karabakh war. By official counts, it cost over 3,000 lives in Armenia and  $\sim 3,000$  in Azerbaijan (Welt and Bowen, 2021), but we took 4000 deaths in each country to obtain a conservative estimate of COVID-related excess mortality. A similar correction was done for Belgium, Netherlands, France, Luxembourg, and Germany, where our data show a peak of excess deaths in August 2020, not associated with COVID-19 (see below) and likely corresponding to a heat wave (Fouillet et al., 2006, 2008; Flynn et al., 2005). We excluded weeks 32–34 from the excess mortality calculation in these five countries. This decreased the excess mortality estimates for these countries by 1,500, 660, 1,600, 35, and 3,700, respectively. Note that some other countries may have also experienced non-COVID-related events leading to excess mortality. For example, Russian data suggest  $\sim 10,000$  excess deaths from a heat wave in July 2020 in Ural and East Siberia (Kobak, 2021). We do not correct for this here because it is difficult to separate July 2020 excess deaths into those due to COVID and those due to the heat wave, based on the country-level data alone.

Apart from the raw number of excess deaths, we report the number of excess deaths per 100,000 population (see below), and the number of excess deaths relative to the baseline annual deaths. For two countries (Uruguay and El Salvador), the baseline data did not cover the entire year. There we estimated the baseline annual number of deaths as the baseline number for the existing period (e.g. January–August) times the ratio of the full year length to the length of the existing period (i.e. 12/8).

## 2.4 Other data sources

We took the officially reported COVID-19 death counts from the Johns Hopkins University dataset (<https://github.com/CSSEGISandData/COVID-19>) (Dong et al., 2020) as distributed by *Our World in Data*. To find the number of officially reported COVID-19 deaths at the time corresponding to our excess mortality estimate, we assumed that all weekly data conform to the ISO 8601 standard, and took the officially reported number on the last day of the last week available in our dataset. Some countries use non-ISO weeks (e.g. starting from January 1st), but the difference is at most several days. ISO weeks are also assumed in the ‘Data until’ column in Table 1. We manually added officially reported numbers for the following countries and territories: Hong Kong (109; taken from Johns Hopkins University dataset directly), Macao (0), Greenland (0), Transnistria (689; taken from the Telegram channel <https://t.me/novostipmrcom>).

Note that for some countries there are different sources of official data, e.g. Russia officially reports monthly numbers of confirmed and suspected COVID deaths that are substantially larger than the daily reported numbers (Kobak, 2021). However, it is the daily reported numbers that get into the World Health Organisation and Johns Hopkins University (JHU) dashboards, so for consistency, here we always use daily values as collected by JHU.

To estimate excess deaths per 100,000 population, we took the population size data from the World Bank dataset (<https://data.worldbank.org/indicator/SP.POP.TOTL>). The value for Russia in that dataset does not include Crimea due to its disputed status, but all Russian data of all-cause and COVID-19 mortality does include Crimea. For that reason, we used the population value of 146,748,590, provided by the Russian Federal State Statistics Service, and similarly changed the value for Ukraine to 41,762,138, provided by the Ukrainian State Statistics Service. The numbers for Taiwan and Transnistria were absent in the World Bank dataset, so we used the values obtained from Wikipedia (23,568,378 and 467,400, respectively).

Note that some of the population size estimates in the World Bank dataset may be outdated or unreliable. Therefore, for some of the countries our excess death rates may be only approximate (Spoorenberg, 2020).

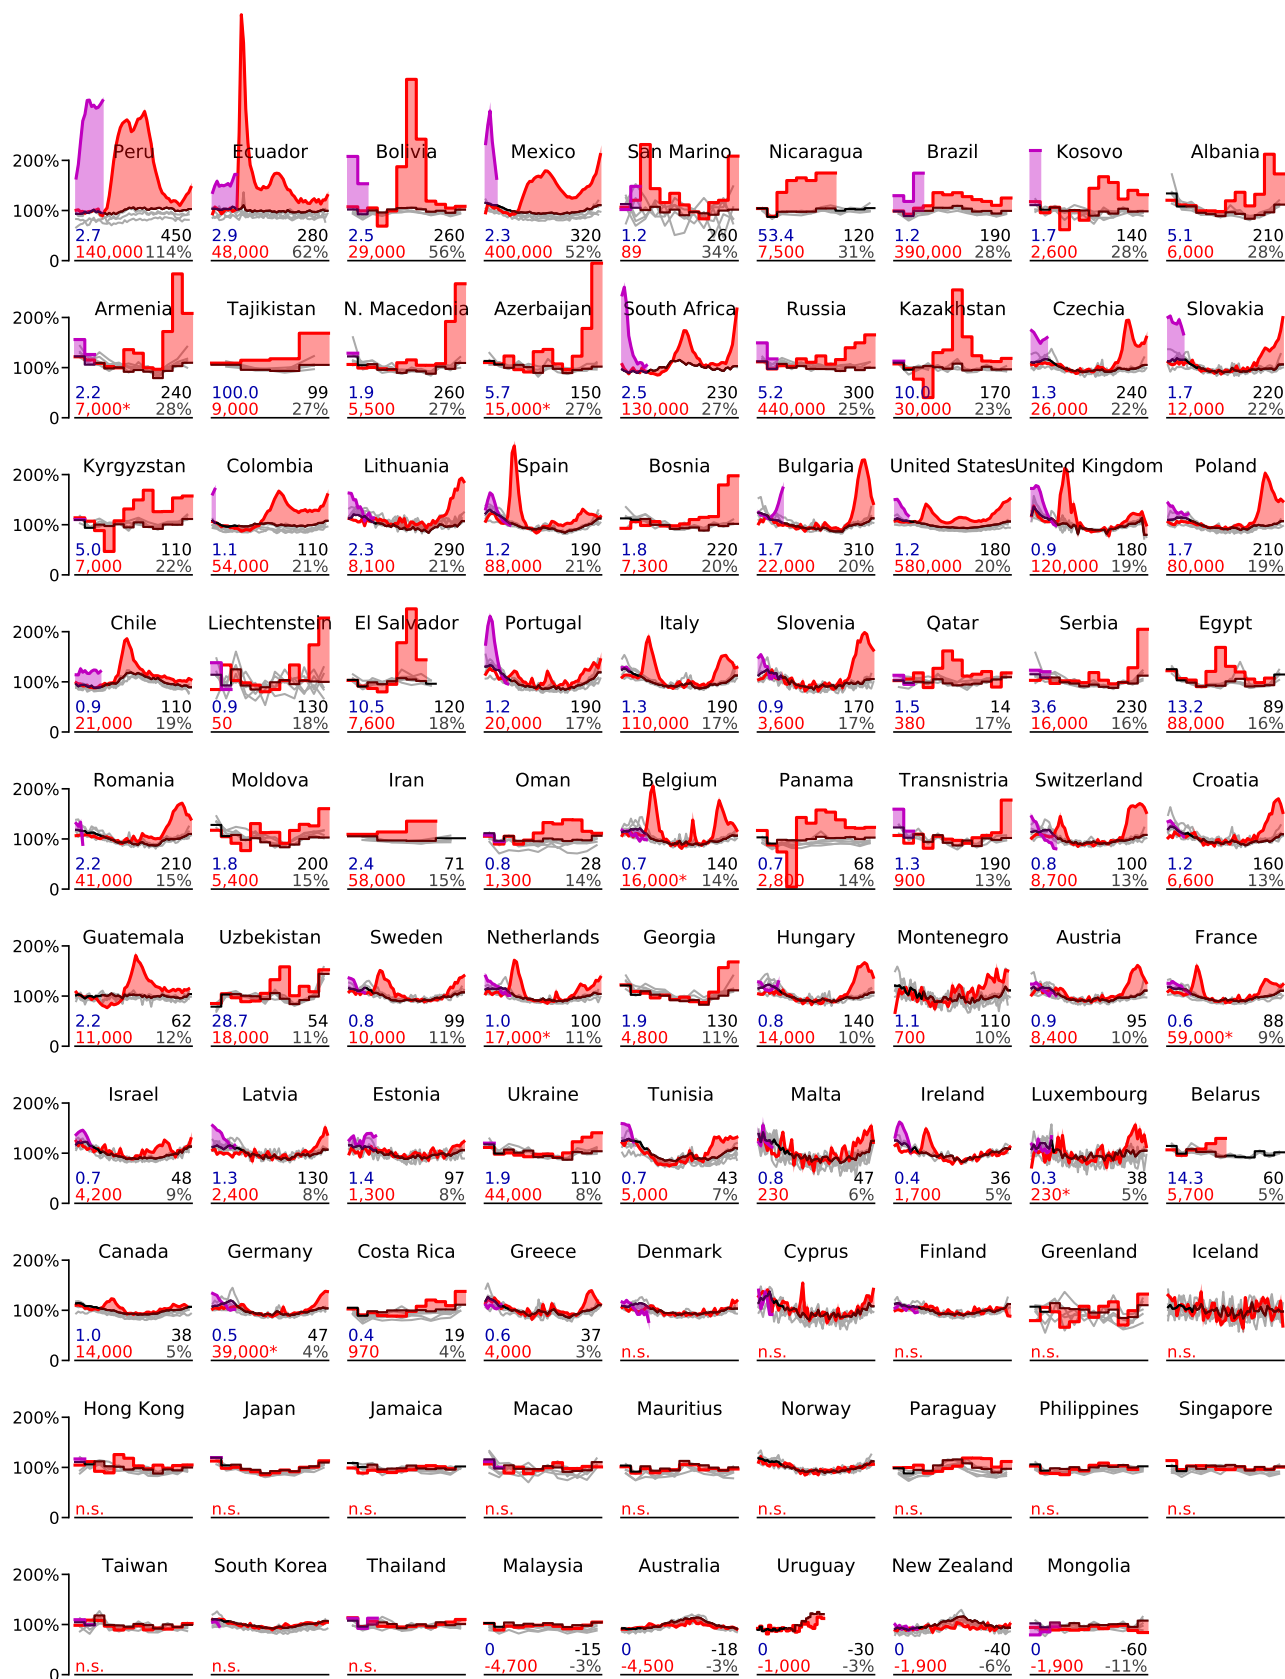

**Figure 2: Excess mortality time series.** Each subplot shows baseline mortality (black), mortality in 2015–2019 (gray), in 2020 (red) and in 2021 (purple). Excess mortality is shown in red/purple shading. The numbers in each subplot are: total excess mortality (red), excess mortality per 100,000 population (black), excess mortality as a percentage of annual baseline mortality (gray), and undercount ratio of COVID-19 deaths (blue). See text for the exact definitions. “n.s.” – excess mortality not significantly different from zero ( $t < 2$ ). All numbers were rounded to two significant digits. The  $y$ -axis in each subplot starts at 0 and goes until 200% where 100% corresponds to the average baseline mortality. The  $x$ -axis covers the entire year. Asterisks mark excess mortality estimates that were downwards corrected (see Methods). Countries are sorted by the excess mortality as a percentage of annual baseline mortality (gray number).

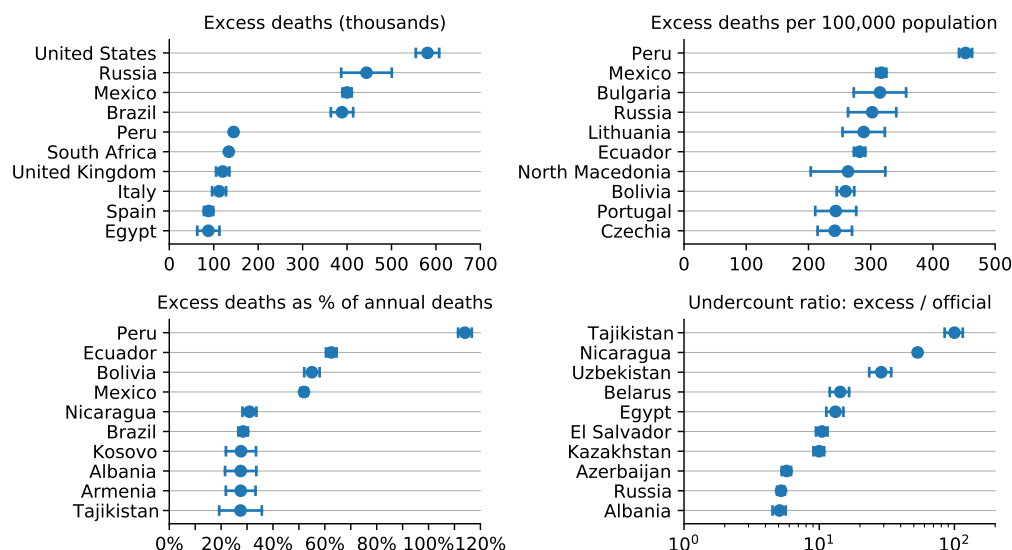

**Figure 3: Top 10 countries in the World Mortality Dataset by various excess mortality measures.** Each subplot shows the top 10 countries for each of our four excess mortality measures: total number of excess deaths; excess deaths per 100,000 population; excess deaths as a percentage of baseline annual mortality; undercount ratio (ratio of excess deaths to reported COVID-19 deaths by the same date). Error bars denote 95% confidence intervals corresponding to the uncertainty of the excess death estimate. Countries with population below 50,000 are not shown. Different countries have different reporting lags, so the estimates shown here correspond to different time points (Table 1). Excess mortality estimates in Armenia and Azerbaijan were downwards corrected by 4,000 to account for the war casualties (see Methods).

## 3 Results

### 3.1 Excess mortality

We collected the all-cause mortality data from 89 countries and territories into the openly-available *World Mortality Dataset*. This includes 47 countries with weekly data, 40 countries with monthly data, and 2 countries with quarterly data (Figure 1).

For each country we computed the total excess mortality from the beginning of the COVID-19 pandemic (Figure 2, Table 1). The excess mortality was positive and significantly different from zero in 66 countries; negative and significantly different from zero in 4 countries; not significantly different from zero ( $t < 2$ ) in 17 countries. For 2 remaining countries, there was not enough historic data available in order to assess the significance (see Methods), but in one of these cases the increase in mortality was very large and clearly associated with COVID-19.

In terms of the absolute numbers, the largest excess mortality was observed in the United States (580,000 by February 21, 2021; all reported numbers here and below have been rounded to two significant digits), Russia (440,000 by Feb 28, 2021), Mexico (400,000 by Feb 14, 2021), and Brazil (390,000 by March 31, 2021 (Figure 3). Note that these estimates correspond to different time points as the reporting lags differ between countries (Table 1). Some countries showed negative excess mortality, likely due to lockdown measures and social distancing decreasing the prevalence of influenza (Kung et al., 2020). For example, Australia had  $-4,500$  excess deaths and New Zealand had  $-1,900$  deaths. In both cases, the decrease in mortality happened during the southern hemisphere winter season (Figure 2).

As the raw number of excess deaths can be strongly affected by the country’s population size, we normalized the excess mortality estimates by the population size (Table 1). The highest excess mortality per 100,000 inhabitants was observed in Peru (450), followed by some Latin American and East European countries: Mexico (320), Bulgaria (310), Russia (300), Lithuania (290), Ecuador (280), etc. (Figure 3). Note that many countries with severe outbreaks that received wide international media attention, such as Italy, Spain, and United Kingdom, had lower values (Table 1).

The infection-fatality rate (IFR) of COVID-19 is strongly age-dependent (Levin et al., 2020). As the countries differ in their age structure, the expected overall IFR differs between countries. To account for the age structure, we also normalized the excess mortality estimates by the annual baseline mortality, i.e. the expected number of deaths per year without a pandemic event (Table 1). This relative increase, also known as a *P-score* (Aron

and Muellbauer, 2020), was by far the highest in Latin America: Peru (114%), Ecuador (63%), Bolivia (55%), and Mexico (52%) (Figure 3). These Latin American countries have much younger populations compared to the European and North American countries, which is why the excess mortality per 100,000 inhabitants there was similar to some European countries, but the relative increase in mortality was much higher, suggesting much higher COVID-19 prevalence.

### 3.2 Undercount of COVID deaths

For each country we computed the ratio of the excess mortality to the officially reported COVID-19 death count by the same date. This ratio differed very strongly between countries (Table 1). Some countries had ratio below 1, e.g. 0.6 in France and 0.7 in Belgium. This is likely because these countries include suspected, and not only confirmed, COVID-19 deaths into their official counts, as well as deaths from other causes in confirmed COVID-19 cases. Another reason for ratios below 1 is that the non-COVID mortality may have decreased e.g. due to the influenza suppression (see above), leading to the excess mortality underestimating the true number of COVID deaths.

Nevertheless, most countries showed ratio above 1, suggesting an undercount of COVID-19 deaths (Beaney et al., 2020). Importantly, in many different countries the correlation between weekly reported COVID-19 deaths and weekly excess deaths was very high (Figure 4). This included countries with undercount ratios below 1 (e.g. France,  $r = 0.79$ ; Belgium,  $r = 0.89$ ), as well as countries with undercount ratio above 1 (e.g. Spain, undercount ratio 1.2,  $r = 0.86$ ; United States, undercount ratio 1.2,  $r = 0.74$ ; Mexico, undercount ratio 2.3,  $r = 0.80$ ; Peru, undercount ratio 2.7,  $r = 0.89$ ). The correlations were often higher during the first wave alone (measured until the end of June 2020): e.g.  $r = 0.96$  in Belgium,  $r = 0.87$  in France,  $r = 0.97$  in Spain. High correlations suggest that excess mortality can be fully explained by COVID-19 mortality, even when it is consistently underreported in some countries.

Interestingly, in most countries the undercount ratio was not constant across time, e.g. in the United Kingdom it was above 1 during the first wave but below 1 during the second wave (Figure 4), coincidentally leading to the overall undercount of 1.0 at the time of writing. Similarly, in Spain the undercount ratio was very high during the first wave, but around 1 during the second wave, leading to the overall undercount of 1.2 at the time of writing. This decrease of the undercount ratio may be partially due to improved COVID death reporting, and partially due to the excess mortality underestimating the true COVID mortality in winter seasons due to influenza suppression (see above).

The undercount ratio typically stayed within 1–3 range (Table 1), but some countries showed much larger values. We found the highest undercount ratios in Tajikistan (100), Nicaragua (50), Uzbekistan (30), Belarus (14) and Egypt (13) (Figure 3). Such large undercount ratios strongly suggest purposeful misdiagnosing or underreporting of COVID-19 deaths, as argued by Kobak (2021) for the case of Russia (undercount ratio 5.2).

Summing up the excess mortality estimates across all countries in our dataset gives 3.3 million excess deaths. In contrast, summing up the official COVID-19 death counts gives only 2.1 million deaths, corresponding to the global undercount ratio of 1.56. It is likely that among the countries for which we could not obtain the data the undercount is much higher (Watson et al., 2020b,a; Mwananyanda et al., 2021), so we believe that 1.56 is a conservative lower bound on the global undercount ratio of COVID-19 deaths. At the time of writing, the world’s official COVID-19 death count is 2.9 million. Our results suggest that the true toll may be above 4.5 million.

## 4 Discussion

We presented the World Mortality Dataset — the largest international dataset of all-cause mortality, currently encompassing 89 countries. The dataset is openly available and regularly updated. Our analysis of excess mortality across the entire dataset showed that it exceeded the number of reported COVID-19 deaths by over 1.5.

The coverage and reliability of the data varies across countries, and some of the countries in our dataset may possibly report incomplete mortality numbers (e.g. covering only part of the country), see caveats in Section 2.2. This would make the excess mortality estimate during the COVID-19 outbreak incomplete. Importantly, the early pre-outbreak 2020 data for all countries in our dataset matched the baseline obtained from the historic 2015–2019 data, indicating that the data are self-consistent and the excess mortality estimates are not inflated. Another important caveat is that recent data points in many countries are known to be incomplete, and experience upwards revisions. Both factors mean that some of the excess mortality estimates reported here may be underestimations.

Our analysis supports the view that excess mortality during an epidemic outbreak can be taken as a proxy for COVID-19 mortality (Beaney et al., 2020). Indeed, countries that implemented stringent lockdown and social distancing measures in the absence of COVID-19 community spread, such as Australia and New Zealand, showed



| Country         | Data until   | Type | Official | Excess  | std      | $t$  | Undercount | Per 100k | Increase |
|-----------------|--------------|------|----------|---------|----------|------|------------|----------|----------|
| Albania         | Dec 31, 2020 | m    | 1,200    | 6,000   | ± 670    | 9.0  | 5.1        | 210      | 28%      |
| Armenia         | Feb 28, 2021 | m    | 3,200    | 7,000   | ± 740    | 9.4  | 2.2        | 240      | 28%      |
| Australia       | Dec 27, 2020 | w    | 910      | -4,500  | ± 880    | 5.1  | 0.0        | -18      | -3%      |
| Austria         | Mar 21, 2021 | w    | 9,100    | 8,400   | ± 1,200  | 7.3  | 0.9        | 95       | 10%      |
| Azerbaijan      | Dec 31, 2020 | m    | 2,700    | 15,000  | ± 1,200  | 12.5 | 5.7        | 150      | 27%      |
| Belarus         | Jun 30, 2020 | m    | 400      | 5,700   | ± 930    | 6.1  | 14.0       | 60       | 5%       |
| Belgium         | Mar 21, 2021 | w    | 23,000   | 16,000  | ± 1,500  | 10.5 | 0.7        | 140      | 14%      |
| Bolivia         | Jan 31, 2021 | m    | 10,000   | 29,000  | ± 810    | 36.4 | 2.8        | 260      | 55%      |
| Bosnia          | Dec 31, 2020 | m    | 4,100    | 7,300   | ± 810    | 9.0  | 1.8        | 220      | 20%      |
| Brazil          | Mar 31, 2021 | m    | 330,000  | 390,000 | ± 13,000 | 30.4 | 1.2        | 190      | 28%      |
| Bulgaria        | Mar 28, 2021 | w    | 13,000   | 22,000  | ± 1,500  | 14.7 | 1.7        | 310      | 20%      |
| Canada          | Dec 20, 2020 | w    | 14,000   | 14,000  | ± 1,500  | 9.6  | 1.0        | 38       | 5%       |
| Chile           | Mar 21, 2021 | w    | 22,000   | 21,000  | ± 910    | 22.8 | 0.9        | 110      | 18%      |
| Colombia        | Jan 17, 2021 | w    | 49,000   | 54,000  | ± 1,100  | 47.4 | 1.1        | 110      | 21%      |
| Costa Rica      | Dec 31, 2020 | m    | 2,200    | 970     | ± 380    | 2.5  | 0.4        | 19       | 4%       |
| Croatia         | Feb 28, 2021 | w    | 5,500    | 6,600   | ± 800    | 8.2  | 1.2        | 160      | 13%      |
| Cyprus          | Feb 21, 2021 | w    | 230      | 200     | ± 130    | 1.5  | n.s.       | n.s.     | n.s.     |
| Czechia         | Feb 28, 2021 | w    | 20,000   | 26,000  | ± 1,500  | 17.2 | 1.3        | 240      | 22%      |
| Denmark         | Mar 21, 2021 | w    | 2,400    | -130    | ± 500    | 0.3  | n.s.       | n.s.     | n.s.     |
| Ecuador         | Mar 28, 2021 | w    | 17,000   | 48,000  | ± 800    | 60.2 | 2.9        | 280      | 62%      |
| Egypt           | Nov 30, 2020 | m    | 6,700    | 88,000  | ± 13,000 | 6.9  | 13.0       | 89       | 16%      |
| El Salvador     | Aug 31, 2020 | m    | 720      | 7,600   | ± 750    | 10.2 | 10.0       | 120      | 18%      |
| Estonia         | Apr 04, 2021 | w    | 940      | 1,300   | ± 250    | 5.2  | 1.4        | 97       | 8%       |
| Finland         | Mar 21, 2021 | w    | 800      | 1       | ± 550    | 0.0  | n.s.       | n.s.     | n.s.     |
| France          | Mar 21, 2021 | w    | 92,000   | 59,000  | ± 7,000  | 8.4  | 0.6        | 88       | 9%       |
| Georgia         | Dec 31, 2020 | m    | 2,500    | 4,800   | ± 1,000  | 4.7  | 1.9        | 130      | 11%      |
| Germany         | Mar 21, 2021 | w    | 75,000   | 39,000  | ± 14,000 | 2.8  | 0.5        | 47       | 4%       |
| Greece          | Jan 03, 2021 | w    | 5,000    | 5,900   | ± 1,500  | 3.9  | 1.2        | 55       | 5%       |
| Greenland       | Dec 31, 2020 | m    | 0        | -16     | ± 34     | 0.5  | n.s.       | n.s.     | n.s.     |
| Guatemala       | Dec 27, 2020 | w    | 4,800    | 11,000  | ± 670    | 15.9 | 2.2        | 62       | 12%      |
| Hong Kong       | Jan 31, 2021 | m    | 110      | 2,400   | ± 1,300  | 1.9  | n.s.       | n.s.     | n.s.     |
| Hungary         | Mar 14, 2021 | w    | 17,000   | 14,000  | ± 1,900  | 7.1  | 0.8        | 140      | 10%      |
| Iceland         | Jan 03, 2021 | w    | 29       | -23     | ± 60     | 0.4  | n.s.       | n.s.     | n.s.     |
| Iran            | Sep 21, 2020 | q    | 24,000   | 58,000  | ± 7,900  | 7.3  | 2.4        | 71       | 15%      |
| Ireland         | Feb 28, 2021 | w    | 4,300    | 1,700   | ± 380    | 4.6  | 0.4        | 36       | 5%       |
| Israel          | Feb 28, 2021 | w    | 5,800    | 4,200   | ± 440    | 9.7  | 0.7        | 48       | 9%       |
| Italy           | Jan 31, 2021 | w    | 89,000   | 110,000 | ± 8,000  | 14.0 | 1.3        | 190      | 17%      |
| Jamaica         | Nov 30, 2020 | m    | 260      | -320    | ± 310    | 1.0  | n.s.       | n.s.     | n.s.     |
| Japan           | Jan 31, 2021 | m    | 5,800    | -17,000 | ± 9,700  | 1.8  | n.s.       | n.s.     | n.s.     |
| Kazakhstan      | Jan 31, 2021 | m    | 3,000    | 30,000  | ± 2,800  | 11.0 | 10.0       | 170      | 23%      |
| Kosovo          | Jan 31, 2021 | m    | 1,500    | 2,600   | ± 280    | 9.3  | 1.7        | 140      | 28%      |
| Kyrgyzstan      | Jan 31, 2021 | m    | 1,400    | 7,000   | ± 560    | 12.6 | 5.0        | 110      | 22%      |
| Latvia          | Mar 21, 2021 | w    | 1,800    | 2,400   | ± 350    | 7.0  | 1.3        | 130      | 8%       |
| Liechtenstein   | Feb 28, 2021 | m    | 54       | 50      | ± 24     | 2.1  | 0.9        | 130      | 18%      |
| Lithuania       | Mar 28, 2021 | w    | 3,600    | 8,100   | ± 490    | 16.7 | 2.3        | 290      | 21%      |
| Luxembourg      | Mar 14, 2021 | w    | 680      | 280     | ± 110    | 2.5  | 0.4        | 45       | 6%       |
| Macao           | Feb 28, 2021 | m    | 0        | -17     | ± 100    | 0.2  | n.s.       | n.s.     | n.s.     |
| Malaysia        | Dec 31, 2020 | m    | 470      | -4,700  | ± 1,600  | 3.0  | 0.0        | -15      | -3%      |
| Malta           | Feb 21, 2021 | w    | 300      | 230     | ± 93     | 2.5  | 0.8        | 47       | 6%       |
| Mauritius       | Dec 31, 2020 | m    | 10       | -330    | ± 190    | 1.8  | n.s.       | n.s.     | n.s.     |
| Mexico          | Feb 14, 2021 | w    | 170,000  | 400,000 | ± 5,200  | 76.2 | 2.3        | 320      | 52%      |
| Moldova         | Dec 31, 2020 | m    | 3,000    | 5,400   | ± 730    | 7.4  | 1.8        | 200      | 15%      |
| Mongolia        | Mar 31, 2021 | m    | 8        | -1,900  | ± 440    | 4.3  | 0.0        | -60      | -11%     |
| Montenegro      | Dec 27, 2020 | w    | 670      | 700     | ± 130    | 5.2  | 1.1        | 110      | 10%      |
| Netherlands     | Mar 21, 2021 | w    | 16,000   | 18,000  | ± 1,600  | 10.9 | 1.1        | 100      | 11%      |
| New Zealand     | Mar 14, 2021 | w    | 26       | -1,900  | ± 330    | 5.9  | 0.0        | -40      | -6%      |
| Nicaragua       | Aug 31, 2020 | m    | 140      | 7,500   | ± 330    | 22.7 | 53.0       | 120      | 31%      |
| North Macedonia | Jan 31, 2021 | m    | 2,900    | 5,500   | ± 640    | 8.6  | 1.9        | 260      | 27%      |
| Norway          | Jan 03, 2021 | w    | 440      | 170     | ± 370    | 0.5  | n.s.       | n.s.     | n.s.     |
| Oman            | Feb 28, 2021 | m    | 1,600    | 1,300   | ± 280    | 4.8  | 0.8        | 28       | 14%      |
| Panama          | Dec 31, 2020 | m    | 4,100    | 2,800   | ± 320    | 8.7  | 0.7        | 68       | 14%      |
| Paraguay        | Dec 31, 2020 | m    | 2,300    | 1,100   | ± 670    | 1.6  | n.s.       | n.s.     | n.s.     |
| Peru            | Apr 04, 2021 | w    | 53,000   | 140,000 | ± 1,700  | 85.0 | 2.7        | 450      | 114%     |
| Philippines     | Nov 30, 2020 | m    | 8,400    | -11,000 | ± 5,500  | 2.0  | n.s.       | n.s.     | n.s.     |
| Poland          | Mar 14, 2021 | w    | 47,000   | 80,000  | ± 4,500  | 17.7 | 1.7        | 210      | 19%      |
| Portugal        | Mar 21, 2021 | w    | 17,000   | 25,000  | ± 1,700  | 14.5 | 1.5        | 240      | 22%      |
| Qatar           | Feb 28, 2021 | m    | 260      | 380     | ± 62     | 6.1  | 1.5        | 14       | 17%      |
| Romania         | Jan 31, 2021 | w    | 18,000   | 41,000  | ± 2,800  | 14.2 | 2.2        | 210      | 15%      |
| Russia          | Feb 28, 2021 | m    | 85,000   | 440,000 | ± 29,000 | 15.3 | 5.2        | 300      | 25%      |
| San Marino      | Feb 28, 2021 | m    | 74       | 89      | ± 26     | 3.4  | 1.2        | 260      | 34%      |
| Serbia          | Feb 28, 2021 | m    | 4,500    | 16,000  | ± 3,700  | 4.4  | 3.6        | 230      | 16%      |
| Singapore       | Dec 31, 2020 | m    | 29       | -290    | ± 310    | 0.9  | n.s.       | n.s.     | n.s.     |
| Slovakia        | Feb 28, 2021 | w    | 7,200    | 12,000  | ± 740    | 16.5 | 1.7        | 220      | 22%      |
| Slovenia        | Mar 21, 2021 | w    | 4,000    | 3,600   | ± 320    | 11.2 | 0.9        | 170      | 17%      |
| South Africa    | Mar 28, 2021 | w    | 53,000   | 130,000 | ± nan    | nan  | 2.5        | 230      | 27%      |
| South Korea     | Jan 31, 2021 | w    | 1,400    | -2,300  | ± 2,500  | 0.9  | n.s.       | n.s.     | n.s.     |
| Spain           | Mar 28, 2021 | w    | 75,000   | 88,000  | ± 5,300  | 16.7 | 1.2        | 190      | 21%      |
| Sweden          | Feb 28, 2021 | w    | 13,000   | 10,000  | ± 850    | 11.9 | 0.8        | 99       | 11%      |
| Switzerland     | Mar 21, 2021 | w    | 10,000   | 8,800   | ± 920    | 9.6  | 0.9        | 100      | 13%      |
| Taiwan          | Feb 28, 2021 | m    | 9        | -5,400  | ± 4,700  | 1.1  | n.s.       | n.s.     | n.s.     |
| Tajikistan      | Dec 31, 2020 | q    | 90       | 9,000   | ± 1,400  | 6.6  | 100.0      | 99       | 27%      |
| Thailand        | Mar 31, 2021 | m    | 94       | 6,700   | ± 11,000 | 0.6  | n.s.       | n.s.     | n.s.     |
| Transnistria    | Feb 28, 2021 | m    | 690      | 900     | ± 200    | 4.4  | 1.3        | 190      | 13%      |
| Tunisia         | Feb 14, 2021 | w    | 7,500    | 5,000   | ± 1,000  | 4.9  | 0.7        | 43       | 7%       |
| Ukraine         | Jan 31, 2021 | m    | 24,000   | 44,000  | ± 11,000 | 4.2  | 1.9        | 110      | 8%       |
| United Kingdom  | Mar 14, 2021 | w    | 130,000  | 120,000 | ± 7,600  | 15.8 | 1.0        | 180      | 20%      |
| United States   | Feb 21, 2021 | w    | 500,000  | 580,000 | ± 13,000 | 43.3 | 1.2        | 180      | 20%      |
| Uruguay         | Jul 26, 2020 | w    | 34       | -1,000  | ± nan    | nan  | 0.0        | -30      | -3%      |
| Uzbekistan      | Dec 31, 2020 | m    | 610      | 18,000  | ± 3,300  | 5.4  | 29.0       | 54       | 11%      |

**Table 1: Excess mortality metrics for all countries in the dataset.** Abbreviations: “w” – weekly data, “m” – monthly data, “q” – quarterly data, “n.s.” – excess mortality was not significantly different from zero ( $t < 2$ ). All numbers were rounded to two significant digits. See text for the exact definitions of all reported metrics. “Official” means the official daily reported number of COVID-19 deaths.

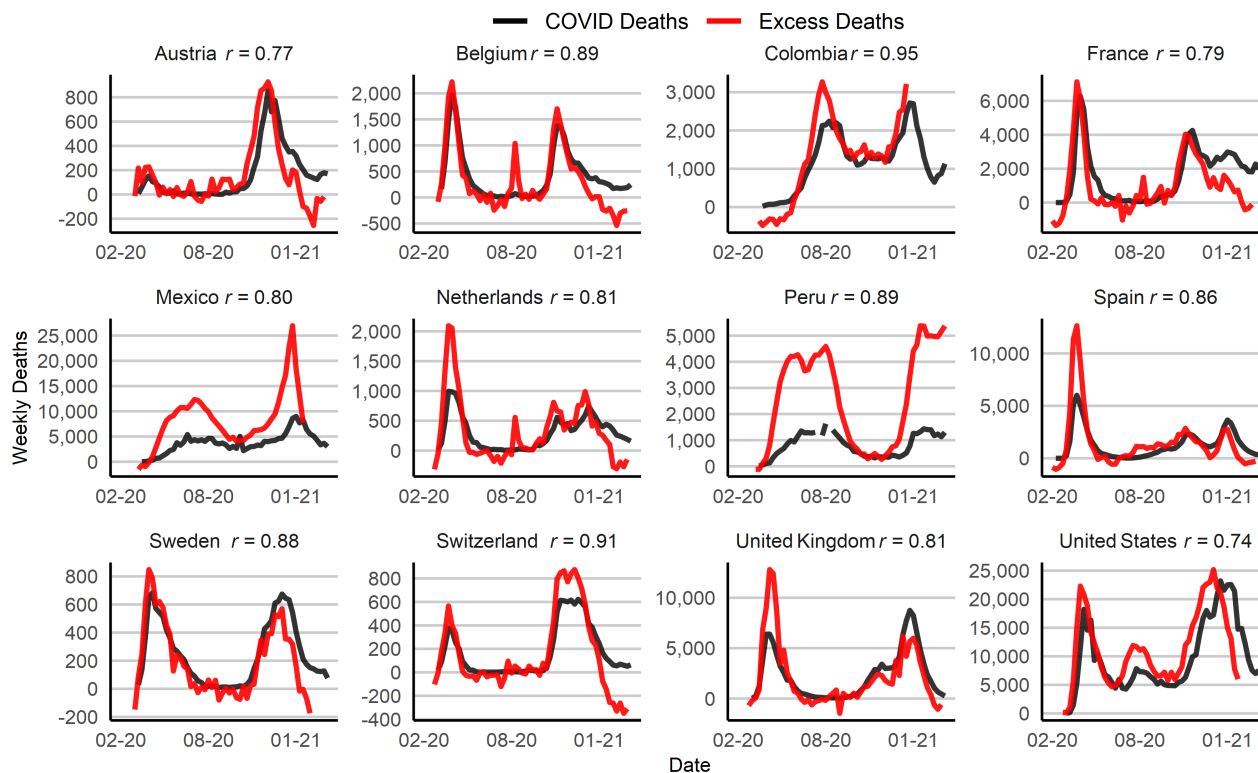

**Figure 4: Relation between weekly excess deaths and weekly reported COVID-19 deaths.** Nine selected countries are shown together with the Pearson correlation coefficient ( $r$ ) between the two time series. Note the peak in excess mortality (but not in the reported COVID-19 deaths) associated with the August 2020 heat wave in Belgium, France, and Netherlands. Peru has two spikes in weekly COVID deaths due to backward revisions in weeks 30 and 33 of over 5000 deaths which were removed from the plot and correlation estimation.

a consistent decrease in all-cause mortality, likely due to reduced influenza transmission (Kung et al., 2020). At the same time, there is evidence that lockdowns reduce violent and accidental deaths (Calderon-Anyosa and Kaufman, 2020). Together, this suggests that lockdown measures on their own decrease — and not increase — the death rate.

As a consequence, one can expect excess mortality to provide a lower bound on the true number of COVID-related deaths. In other words, whenever COVID deaths are counted perfectly, they will exceed the excess mortality, leading to undercount ratio below 1. This is indeed what we observed in several countries with strong COVID-19 outbreaks, e.g. Belgium, France, and Germany (undercount ratios 0.7, 0.6, 0.5, respectively).

It is possible that when a country experiences a particularly strong COVID outbreak, deaths from non-COVID causes may increase due the medical system being overloaded. Our data show that this did not happen in Belgium (undercount ratio during the first wave was around 1.0), despite a  $\sim 100\%$  weekly increase in all-cause mortality. However, our data do not allow to say whether this factor played a role during stronger outbreaks in Latin America, with  $\sim 200\%$  weekly increases in all-cause mortality. Even if it did, then such collateral excess deaths can nevertheless be seen as indirect consequence of COVID-19 outbreaks.

An important caveat is that excess mortality can have non-COVID contributions if a country in 2020–21 experienced some drastic events unrelated to the pandemic. Three examples in our data are the August 2020 heat wave in Belgium and surrounding countries (that led to excess mortality spikes in five countries, with  $\sim 7,500$  deaths in total) and the 2020 Nagorno-Karabakh war between Armenia and Azerbaijan, which cost, by official counts,  $\sim 3000$  lives on each side. We made a correction to our excess mortality estimates to account for these factors (see Methods), but could have possibly missed some other similar events in other countries. However, even if so, we believe these factors could only play a minor role compared to COVID-19, thanks to the absence of other major wars or natural disasters in 2020–21.

The World Mortality Dataset is open for use by researchers and policy makers from all fields. Avenues for future research include the relation between various measures of excess mortality and economic development, population structure, lockdown and social distancing measures, border controls and travel restrictions (Hale et al., 2020), properties of the health-care systems, vaccinations, institutional quality (e.g. the Democracy Index),

climate, geography, population density, and many more. Conversely, future research can use excess mortality estimates to study negative social or economic impact of high COVID-19 death toll.

So far we were able to collect data from 89 nations out of ~200, with particularly sparse coverage in Africa, Asia, and Middle East (Figure 1), where the undercount of COVID deaths may be particularly severe (Watson et al., 2020b,a; Mwananyanda et al., 2021). The COVID-19 pandemic highlighted the great importance of reliable and up-to-date all-cause mortality data. Just as countries around the world collect and regularly report estimates of economic output such as the gross domestic product (GDP), and just as they have been reporting COVID-19 mortality, a comprehensive multi-national repository of all-cause mortality is long overdue (Leon et al., 2020).

**Acknowledgments** The authors would like to thank colleagues at Kohelet Policy Forum, Frédéric Fleury-Payeur, Michael Beenstock, and Maxim S. Pshenichnikov for their helpful comments and G. J. Andrés Uzín P., Luis Salas, Marcelo Oliveira, Otavio Ranzani, Mario Romero Zavala, Laurianne Despeghel, reporters from Eurasianet, Dmitri Tokarev, Michael Hilliard, Andrés N. Robalino, and Gilad Gaibel for their help in obtaining some of the data.

DK was supported by the Deutsche Forschungsgemeinschaft (BE5601/4-1 and the Cluster of Excellence “Machine Learning — New Perspectives for Science”, EXC 2064, project number 390727645), the Federal Ministry of Education and Research (FKZ 01GQ1601 and 01IS18039A) and the National Institute of Mental Health of the National Institutes of Health under Award Number U19MH114830. The content is solely the responsibility of the authors and does not necessarily represent the official views of the National Institutes of Health.

**Data and code availability** The World Mortality Dataset is available at [https://github.com/akarlinsky/world\\_mortality](https://github.com/akarlinsky/world_mortality). The analysis code is available at <https://github.com/dkobak/excess-mortality>. Our baseline estimates for all countries and all values shown in Table 1 are available there as CSV files.

**Author contributions** AK collected the data. AK and DK analyzed the data. AK and DK wrote the paper.

## References

- Gianfranco Alicandro, Giuseppe Remuzzi, and Carlo La Vecchia. Italy's first wave of the COVID-19 pandemic has ended: no excess mortality in May, 2020. *The Lancet*, 396(10253):e27–e28, 2020.
- Janine Aron and John Muellbauer. A pandemic primer on excess mortality statistics and their comparability across countries. Technical report, Our World in Data, 2020. URL <https://ourworldindata.org/covid-excess-mortality>.
- Magali Barbieri, John R Wilmoth, Vladimir M Shkolnikov, Dana Gleit, Domantas Jasilionis, Dmitri Jdanov, Carl Boe, Timothy Riffe, Pavel Grigoriev, and Celeste Winant. Data resource profile: the human mortality database (HMD). *International Journal of Epidemiology*, 44(5):1549–1556, 2015.
- Thomas Beaney, Jonathan M Clarke, Vageesh Jain, Amelia Kataria Golestaneh, Gemma Lyons, David Salman, and Azeem Majeed. Excess mortality: the gold standard in measuring the impact of COVID-19 worldwide? *Journal of the Royal Society of Medicine*, 113(9):329–334, 2020.
- Marta Blangiardo, Michela Cameletti, Monica Pirani, Gianni Corsetti, Marco Battaglini, and Gianluca Baio. Estimating weekly excess mortality at sub-national level in Italy during the COVID-19 pandemic. *PloS One*, 15(10):e0240286, 2020.
- Debra M Boka and Howard Wainer. How can we estimate the death toll from COVID-19? *CHANCE*, 33(3):67–72, 2020.
- Renzo JC Calderon-Anyosa and Jay S Kaufman. Impact of COVID-19 lockdown policy on homicide, suicide, and motor vehicle deaths in Peru. *Preventive Medicine*, 143:106331, 2020.
- Ensheng Dong, Hongru Du, and Lauren Gardner. An interactive web-based dashboard to track COVID-19 in real time. *The Lancet Infectious Diseases*, 20(5):533–534, 2020.
- William Farr. *Vital statistics: a memorial volume of selections from the reports and writings of William Farr*. Offices of the Sanitary Institute, London, 1885.
- CP Farrington, Nick J Andrews, AD Beale, and MA Catchpole. A statistical algorithm for the early detection of outbreaks of infectious disease. *Journal of the Royal Statistical Society: Series A (Statistics in Society)*, 159(3):547–563, 1996.
- Jeremy Samuel Faust, Zhenqiu Lin, and Carlos Del Rio. Comparison of estimated excess deaths in new york city during the COVID-19 and 1918 influenza pandemics. *JAMA Network Open*, 3(8):e2017527–e2017527, 2020.
- A Flynn, C McGreevy, and EC Mulkerrin. Why do older patients die in a heatwave? *QJM: An International Journal of Medicine*, 98(3):227–229, 2005.
- Anne Fouillet, Grégoire Rey, Françoise Laurent, Gérard Pavillon, Stéphanie Bellec, Chantal Guihenneuc-Jouyaux, Jacqueline Clavel, Eric Jouglu, and Denis Hémon. Excess mortality related to the August 2003 heat wave in France. *International Archives of Occupational and Environmental Health*, 80(1):16–24, 2006.
- Anne Fouillet, Grégoire Rey, Véréne Wagner, Karine Laaidi, Pascal Empereur-Bissonnet, Alain Le Tertre, Philippe Frayssinet, Pierre Bessemoulin, Françoise Laurent, Perrine De Crouy-Chanel, et al. Has the impact of heat waves on mortality changed in France since the European heat wave of summer 2003? A study of the 2006 heat wave. *International Journal of Epidemiology*, 37(2):309–317, 2008.
- Mahan Ghafari, Alireza Kadivar, and Aris Katzourakis. Excess deaths associated with the iranian COVID-19 epidemic: a province-level analysis. *medRxiv*, 2020.
- Charlie Giattino, Hanna Ritchie, Max Roser, Ortiz-Ospina Esteban, and Hasell Joe. Excess mortality during the Coronavirus pandemic (COVID-19). Technical report, Our World in Data, 2020. URL <https://ourworldindata.org/excess-mortality-covid>.
- Thomas Hale, Noam Angrist, Emily Cameron-Blake, Laura Hallas, Betriz Kira, Saptarshi Majumdar, Anna Petherick, Toby Phillips, Helen Tatlow, and Samuel Webster. Variation in government responses to COVID-19. *BSG Working Paper Series. Blavatnik School of Government. University of Oxford*, 2020.

- HIQA. Excess all-cause mortality in Ireland during the COVID-19 epidemic. Technical report, Health Information and Quality Authority, 2020. URL <https://www.hiqa.ie/reports-and-publications/health-technology-assessment/analysis-excess-all-cause-mortality-ireland>.
- Dmitry Kobak. Excess mortality reveals Covid’s true toll in Russia. *Significance*, 18(1):16, 2021.
- Vasilis Kontis, James E Bennett, Theo Rashid, Robbie M Parks, Jonathan Pearson-Stuttard, Michel Guillot, Perviz Asaria, Bin Zhou, Marco Battaglini, Gianni Corsetti, et al. Magnitude, demographics and dynamics of the effect of the first wave of the COVID-19 pandemic on all-cause mortality in 21 industrialized countries. *Nature Medicine*, pages 1–10, 2020.
- Stacey Kung, Marjan Doppen, Melissa Black, Tom Hills, and Nethmi Kearns. Reduced mortality in New Zealand during the COVID-19 pandemic. *The Lancet*, 2020.
- Alexander D Langmuir. William Farr: founder of modern concepts of surveillance. *International Journal of Epidemiology*, 5(1):13–18, 1976.
- David A Leon, Vladimir M Shkolnikov, Liam Smeeth, Per Magnus, Markéta Pechholdová, and Christopher I Jarvis. COVID-19: a need for real-time monitoring of weekly excess deaths. *The Lancet*, 395(10234):e81, 2020.
- Andrew T Levin, William P Hanage, Nana Owusu-Boaitey, Kensington B Cochran, Seamus P Walsh, and Gideon Meyerowitz-Katz. Assessing the age specificity of infection fatality rates for COVID-19: systematic review, meta-analysis, and public policy implications. *European Journal of Epidemiology*, pages 1–16, 2020.
- Milken Institute. Ascertainment of the estimated excess mortality from hurricane Maria in Puerto Rico. Technical report, Milken Institute School of Public Health, 2018. URL <https://publichealth.gwu.edu/sites/default/files/downloads/projects/PRstudy/Acertainment%20of%20the%20Estimated%20Excess%20Mortality%20from%20Hurricane%20Maria%20in%20Puerto%20Rico.pdf>.
- Lawrence Mwananyanda, Christopher J Gill, William MacLeod, Geoffrey Kwenda, Rachel Pieciak, Zachariah Mupila, Rotem Lapidot, Francis Mupeta, Leah Forman, Luunga Ziko, et al. Covid-19 deaths in Africa: prospective systematic postmortem surveillance study. *BMJ*, 372, 2021.
- László Németh, Dmitri A Jdanov, and Vladimir M Shkolnikov. An open-sourced, web-based application to analyze weekly excess mortality based on the Short-term Mortality Fluctuations data series. *PLoS ONE*, 16(2):e0246663, 2021.
- Angela Noufaily, Doyo G Enki, Paddy Farrington, Paul Garthwaite, Nick Andrews, and Andre Charlett. An improved algorithm for outbreak detection in multiple surveillance systems. *Statistics in medicine*, 32(7): 1206–1222, 2013.
- Eskild Petersen, Marion Koopmans, Unyeong Go, Davidson H Hamer, Nicola Petrosillo, Francesco Castelli, Merete Storgaard, Sulien Al Khalili, and Lone Simonsen. Comparing SARS-CoV-2 with SARS-CoV and influenza pandemics. *The Lancet Infectious Diseases*, 2020.
- Maelle Salmon, Dirk Schumacher, and Michael Höhle. Monitoring count time series in r: Aberration detection in public health surveillance. *Journal of Statistical Software*, 70(10):1–35, 2016.
- Thomas Spoorenberg. Data and methods for the production of national population estimates: An overview and analysis of available metadata. Technical report, United Nations, Department of Economics and Social Affairs, Population Division, 2020. URL <https://www.un.org/development/desa/pd/content/data-and-methods-production-national-population-estimates-overview-and-analysis-available>.
- STMF. Short-term Mortality Fluctuation data series. Human Mortality Database. University of California Berkeley (USA) and Max Planck Institute for Demographic Research (Germany), 2021. <https://www.mortality.org>.
- UNSD. Demographic yearbook 2019. Technical report, United Nations, Statistics Division, 2019. URL [https://unstats.un.org/unsd/demographic-social/products/dyb/dyb\\_2019/](https://unstats.un.org/unsd/demographic-social/products/dyb/dyb_2019/).
- Javier Vargas-Herrera, Karim Pardo Ruiz, Gladys Garro Nuñez, Janet Miki Ohno, José Enrique Pérez-Lu, William Valdez Huarcaya, Benjamin Clapham, and Juan Cortez-Escalante. Resultados preliminares del fortalecimiento del sistema informático nacional de defunciones. *Revista Peruana de Medicina Experimental y Salud Pública*, 35:505–514, 2018.

- Oliver J. Watson, Nada Abdelmagid, Aljaile Ahmed, Abd Elhameed Ahmed Abd Elhameed, Charles Whittaker, Nicholas Brazeau, Arran Hamlet, Patrick Walker, James Hay, Azra Ghani, Francesco Checchi, and Maysoon Dahab. Report 39 - Characterising COVID-19 epidemic dynamics and mortality under-ascertainment in Khartoum, Sudan. Technical report, MRC Centre for Global Infectious Disease Analysis, 2020a. URL <https://www.imperial.ac.uk/mrc-global-infectious-disease-analysis/covid-19/report-39-sudan>.
- Oliver J. Watson, Mervat Alhaffar, Zaki Mehchy, Whittaker Charles, Zack Akil, Mazen Gharibah, Imperial College COVID-19 Response Team, Francesco Checchi, Neil Ferguson, Ghani Azra, Emma Beals, Patrick Walker, and Anonymous Authors. Report 31 - Estimating under-ascertainment of COVID-19 mortality: an analysis of novel data sources to provide insight into COVID-19 dynamics in Damascus, Syria. Technical report, MRC Centre for Global Infectious Disease Analysis, 2020b. URL <https://www.imperial.ac.uk/mrc-global-infectious-disease-analysis/covid-19/report-31-syria>.
- Daniel M Weinberger, Jenny Chen, Ted Cohen, Forrest W Crawford, Farzad Mostashari, Don Olson, Virginia E Pitzer, Nicholas G Reich, Marcus Russi, Lone Simonsen, et al. Estimation of excess deaths associated with the COVID-19 pandemic in the United States, March to May 2020. *JAMA Internal Medicine*, 180(10):1336–1344, 2020.
- Cory Welt and Andrew S. Bowen. Azerbaijan and Armenia: The Nagorno-Karabakh conflict (R46651). Technical report, Congressional Research Service, 2021. URL <https://fas.org/sgp/crs/row/R46651.pdf>.
- Steven H Woolf, Derek A Chapman, Roy T Sabo, Daniel M Weinberger, and Latoya Hill. Excess deaths from COVID-19 and other causes, March-April 2020. *JAMA*, 324(5):510–513, 2020a.
- Steven H Woolf, Derek A Chapman, Roy T Sabo, Daniel M Weinberger, Latoya Hill, and DaShaunda DH Taylor. Excess deaths from COVID-19 and other causes, March-July 2020. *JAMA*, 324(15):1562–1564, 2020b.
